# Supplementary material for: Acer truncatum Bunge seed oil ameliorated oxaliplatin-induced demyelination by improving mitochondrial dysfunction via the Pink1/Parkin mitophagy pathway
Source: Royal Society of Chemistry journal article supplement (doi:10.1039/d3fo03955b), 2023-12-18
Supplement: d3fo03955b1.pdf [file d3fo03955b1.pdf]

Western blot of Krxo20, sox10 and pmp22 protein (Corresponding to Figure 2)

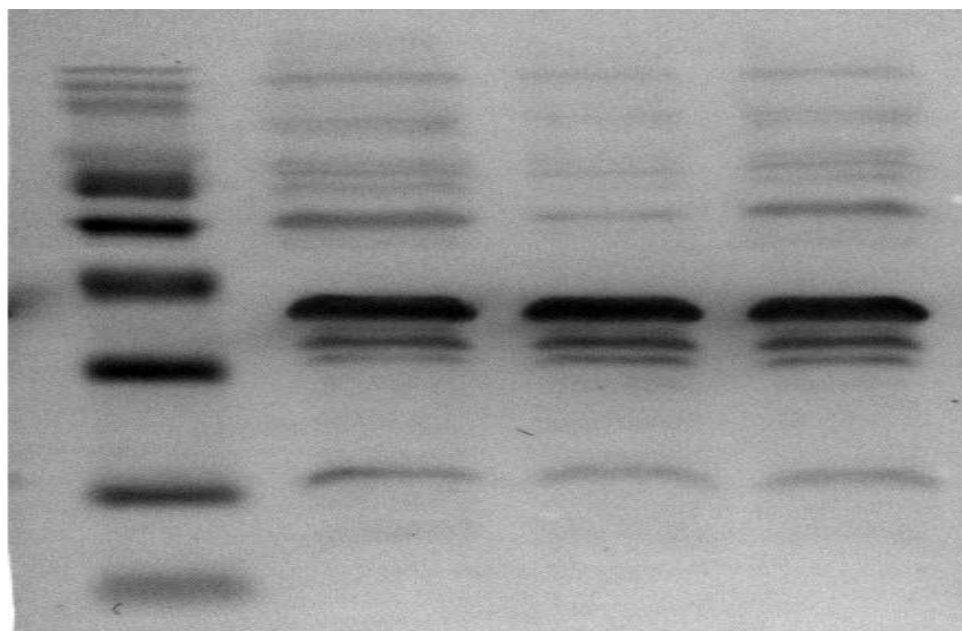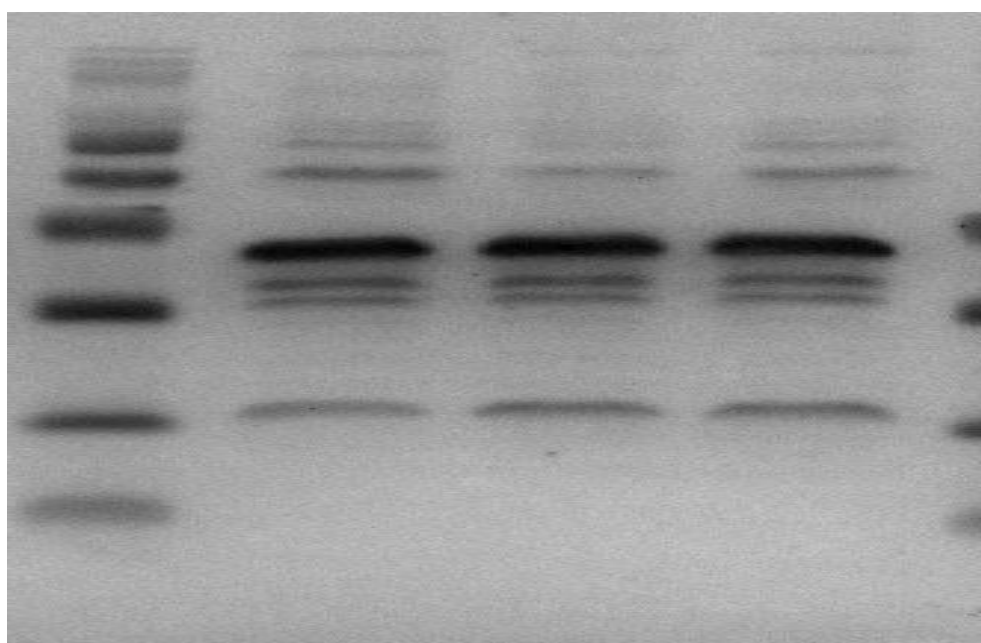

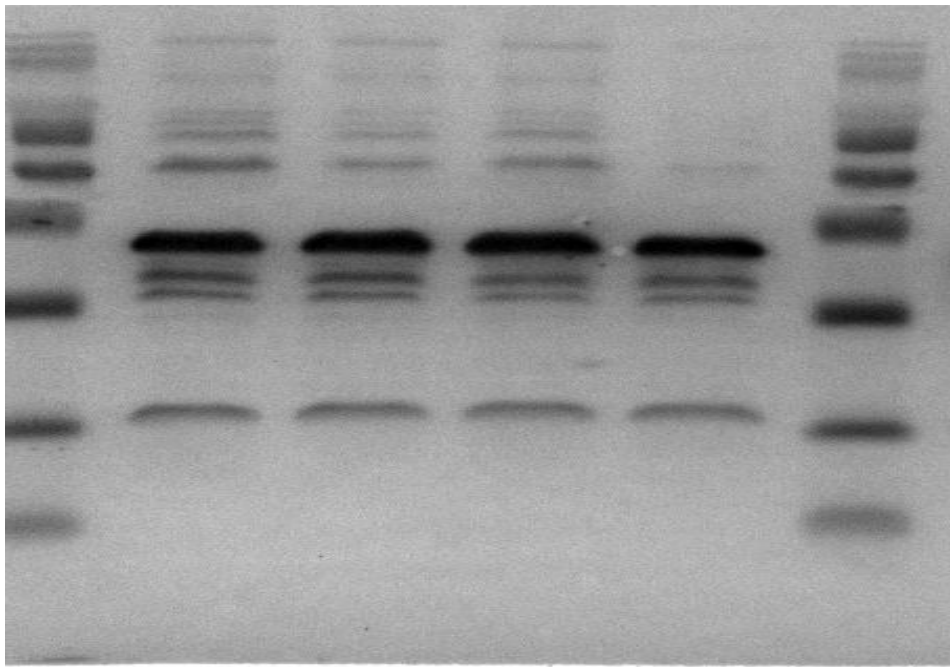

Krox20 (Corresponding to Figure 2)

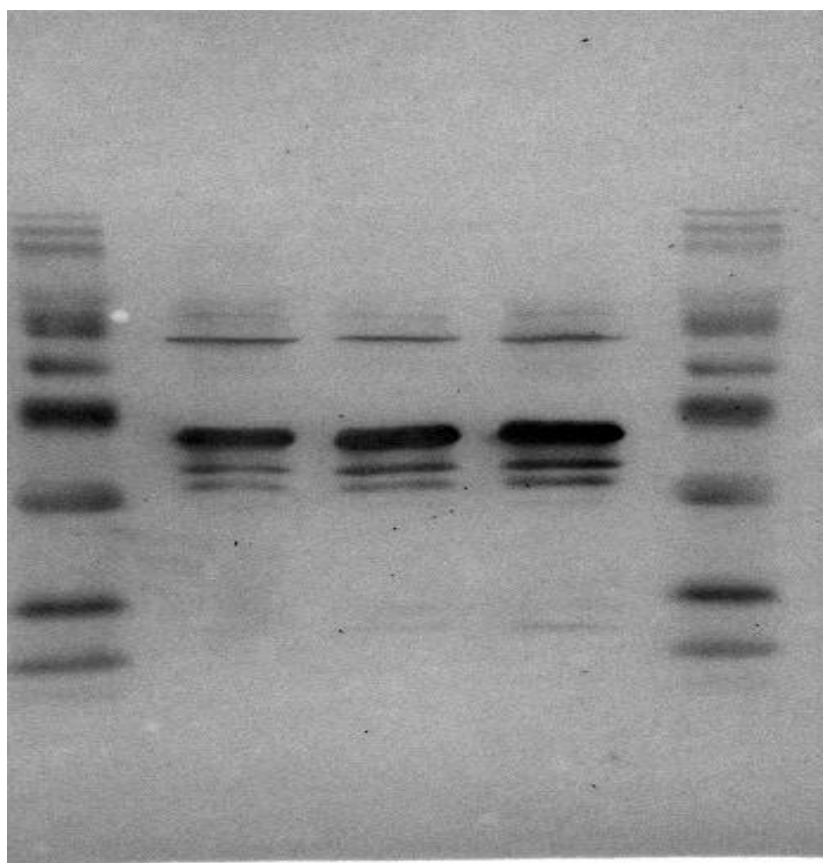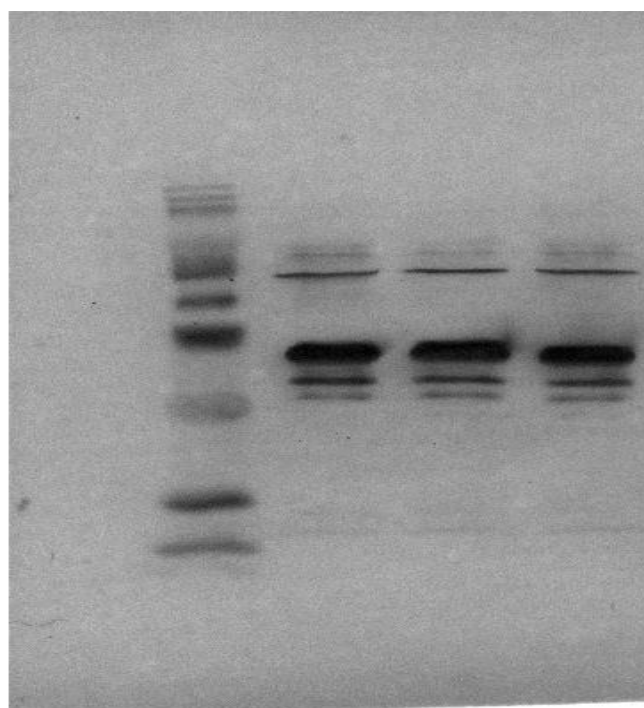

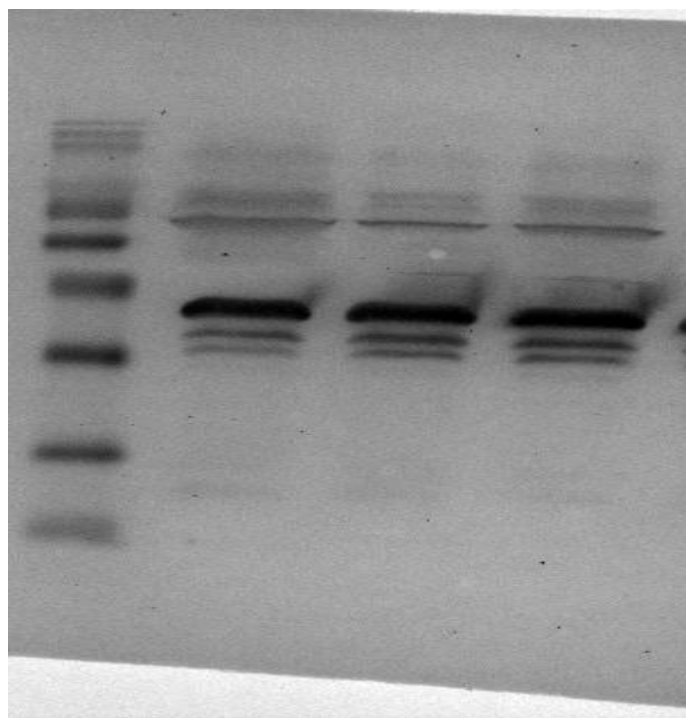

Sox10 (Corresponding to Figure 2)

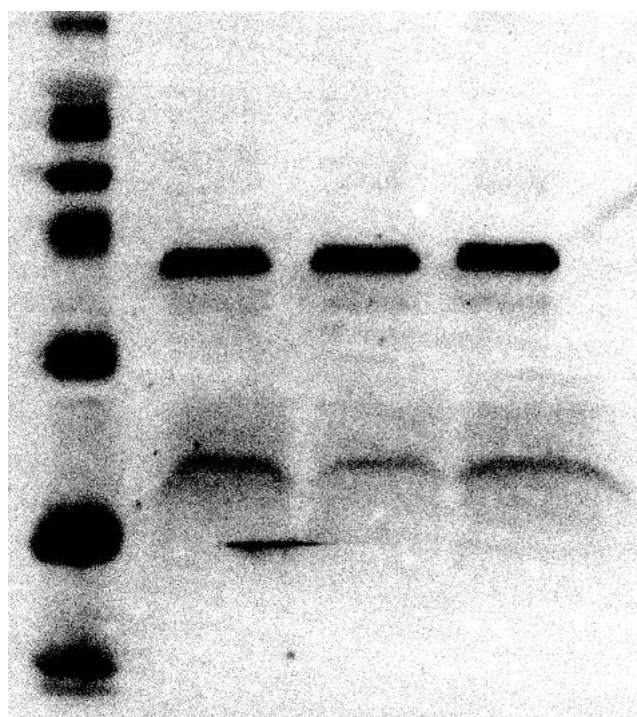

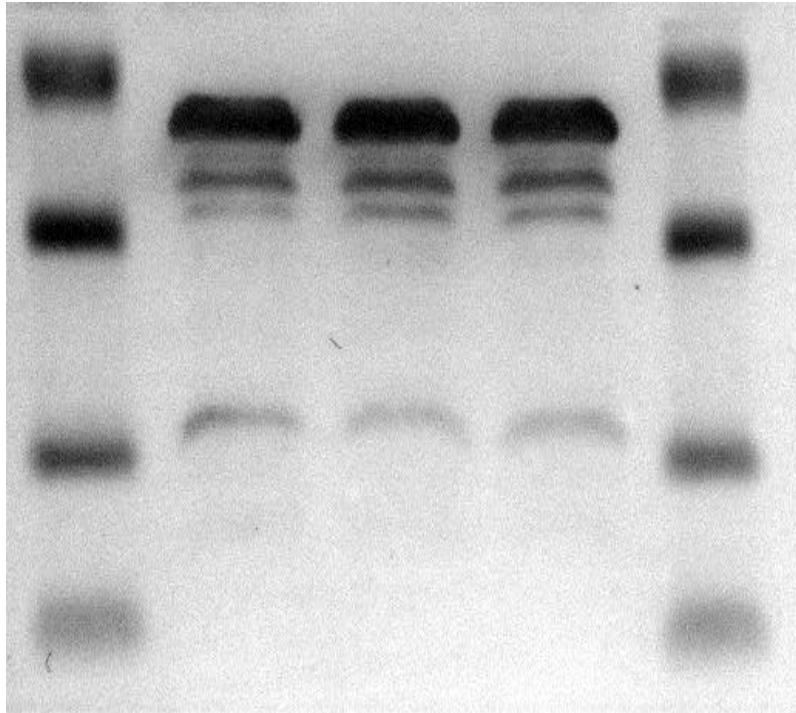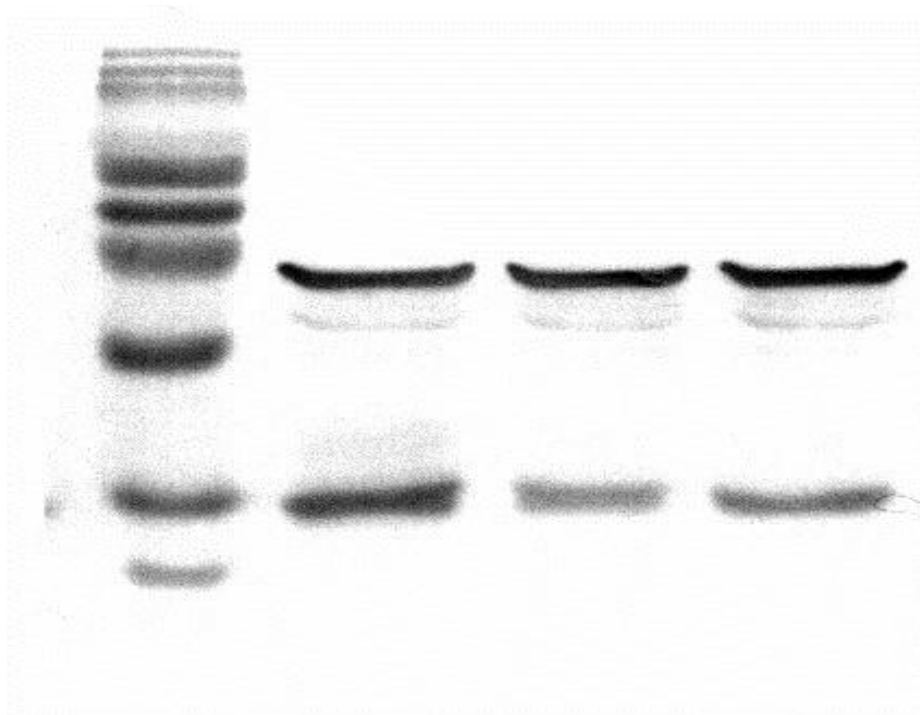

pmp22 (Corresponding to Figure 2)

Western blot of Krxo20, sox10 and pmp22 protein (Corresponding to Figure 4)

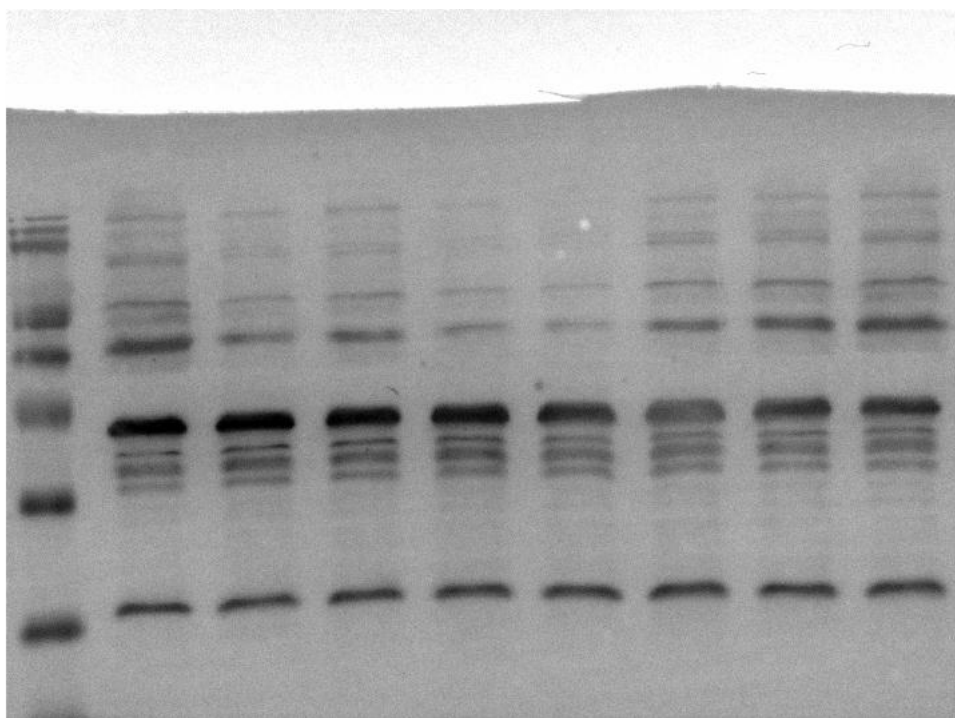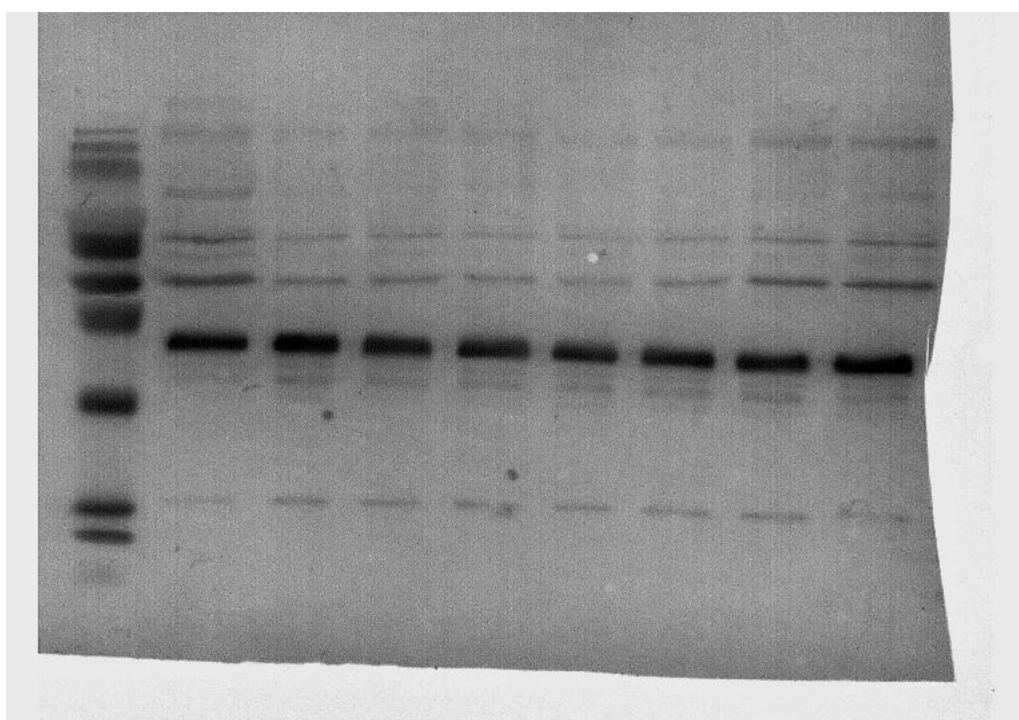

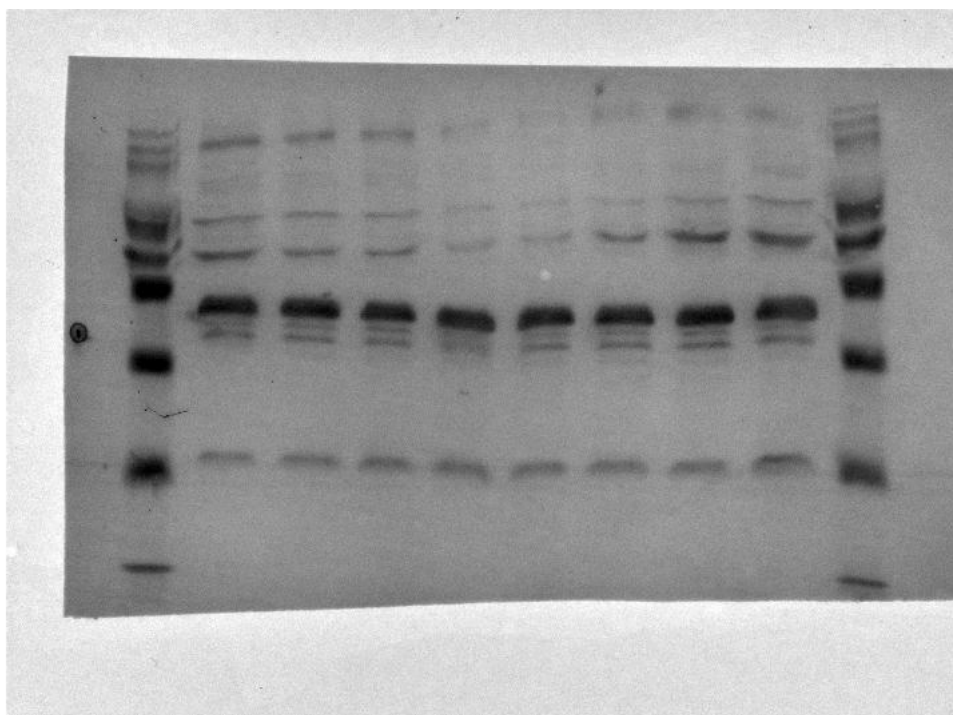

Krox20 (Corresponding to Figure 4)

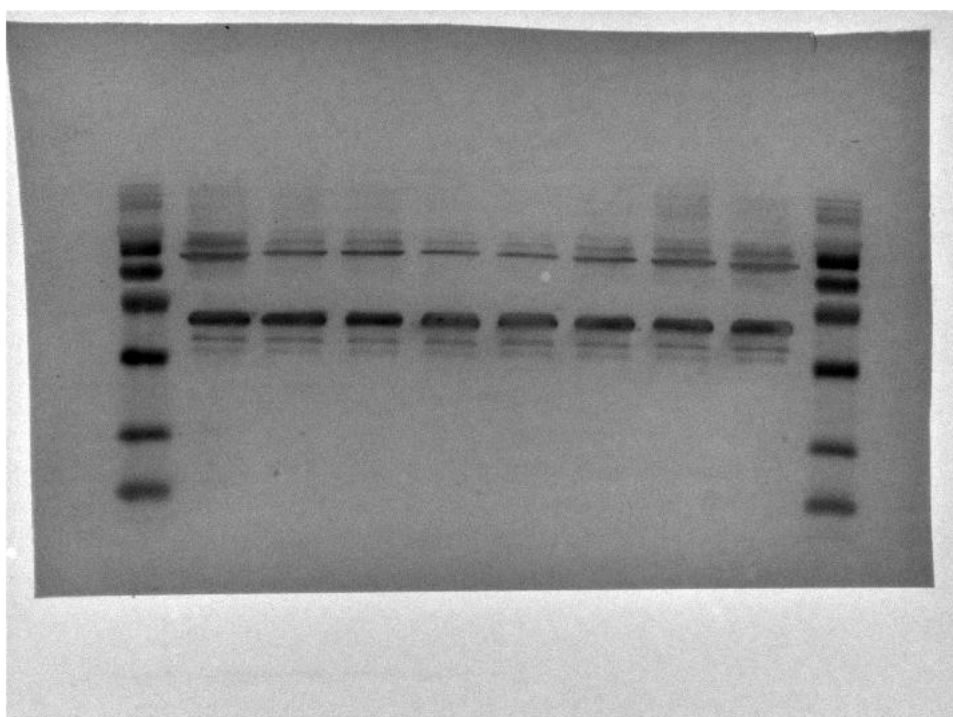

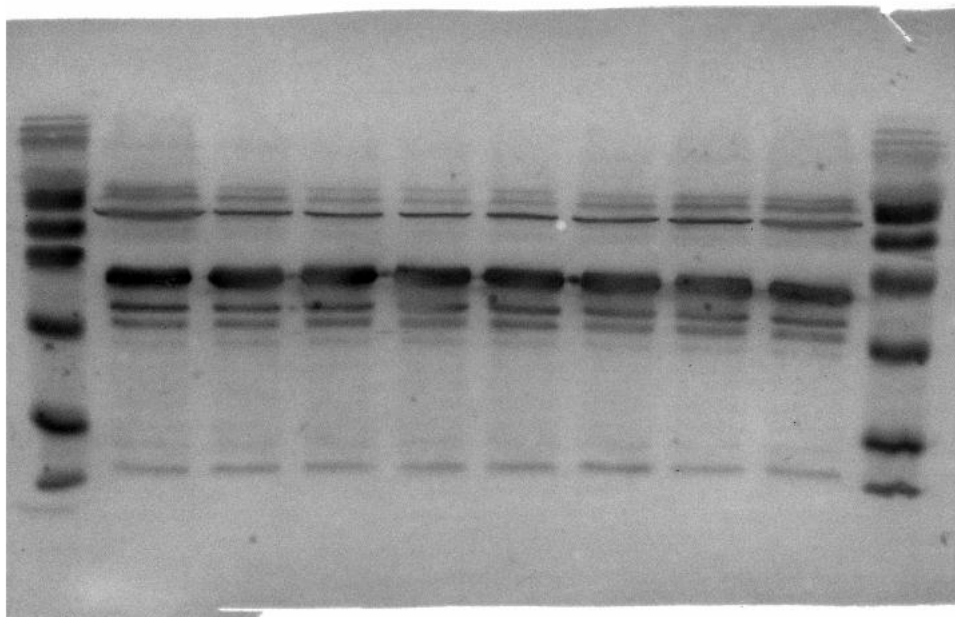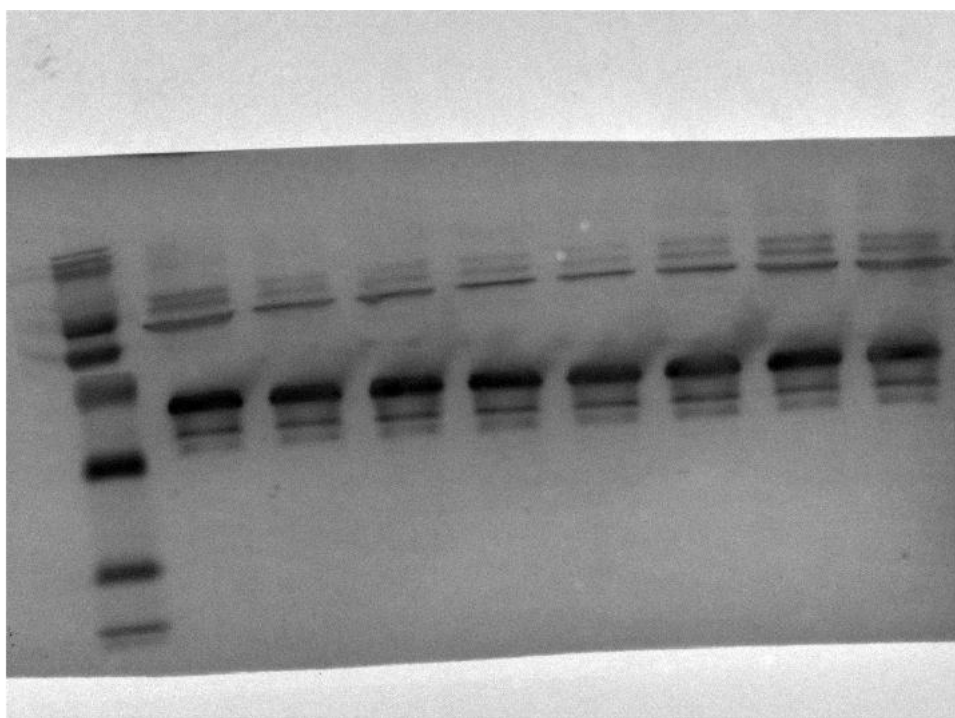

Sox10 (Corresponding to Figure 4)



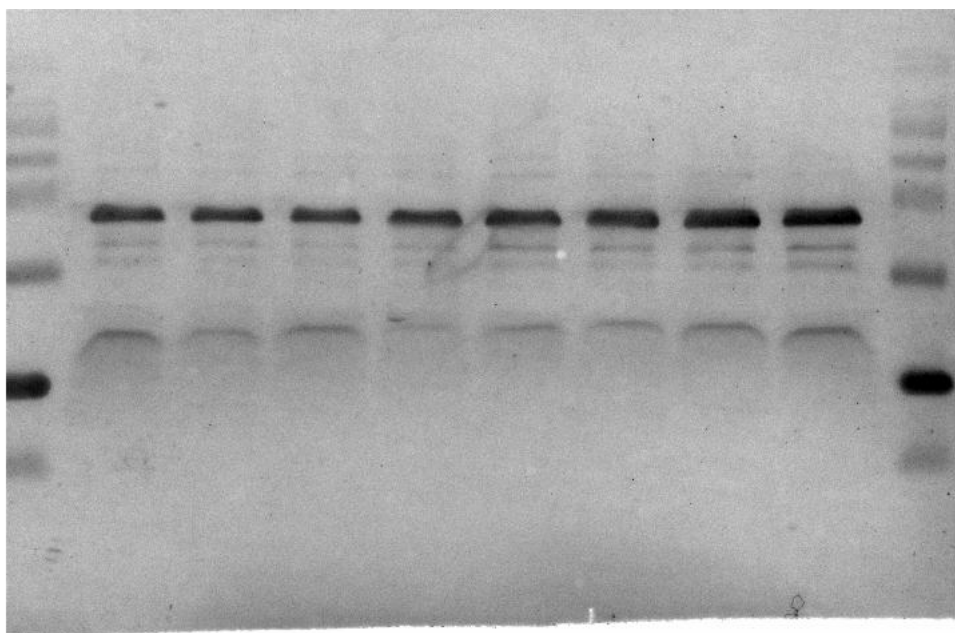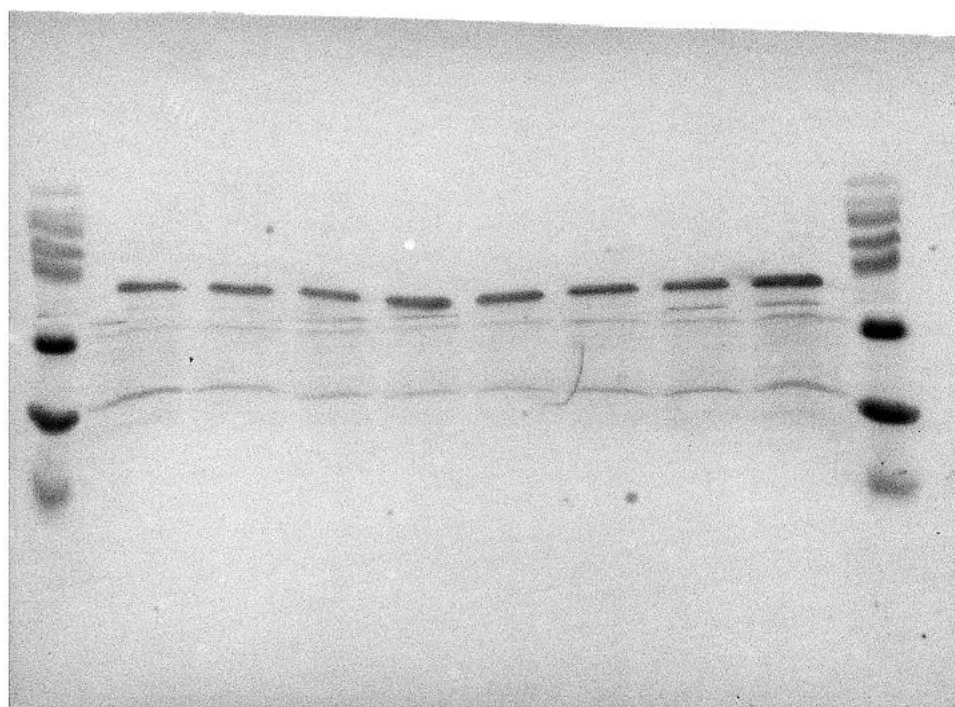

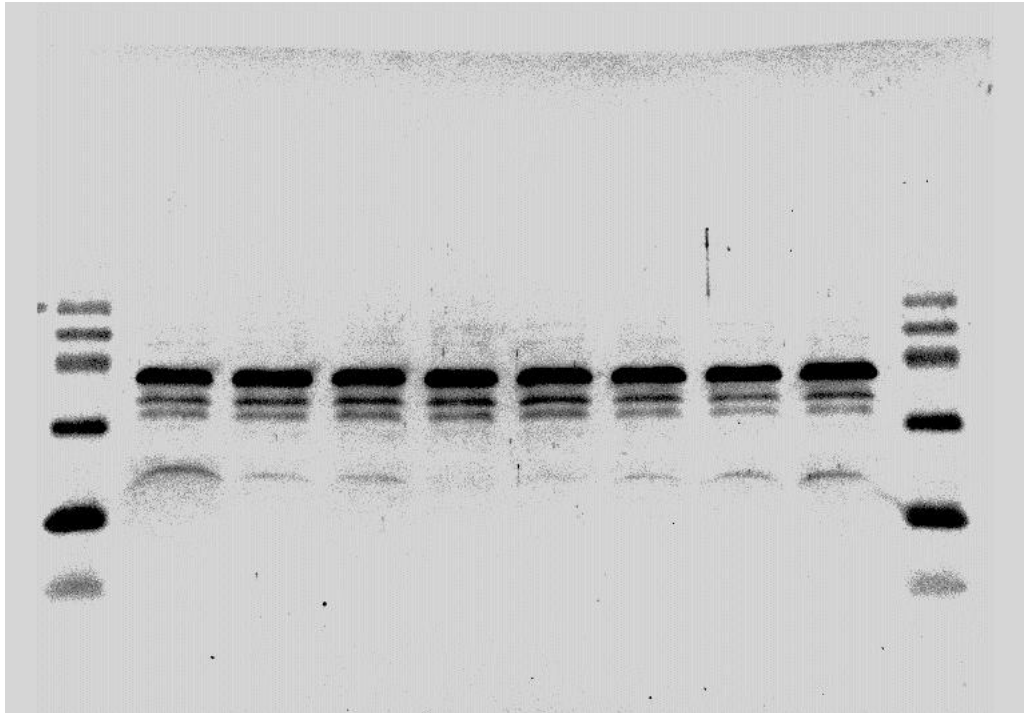

Pmp22 (Corresponding to Figure 4)

Western blot of atg5, p62, LC3B, Pink1 and Parkin protein  
(Corresponding to Figure 6)

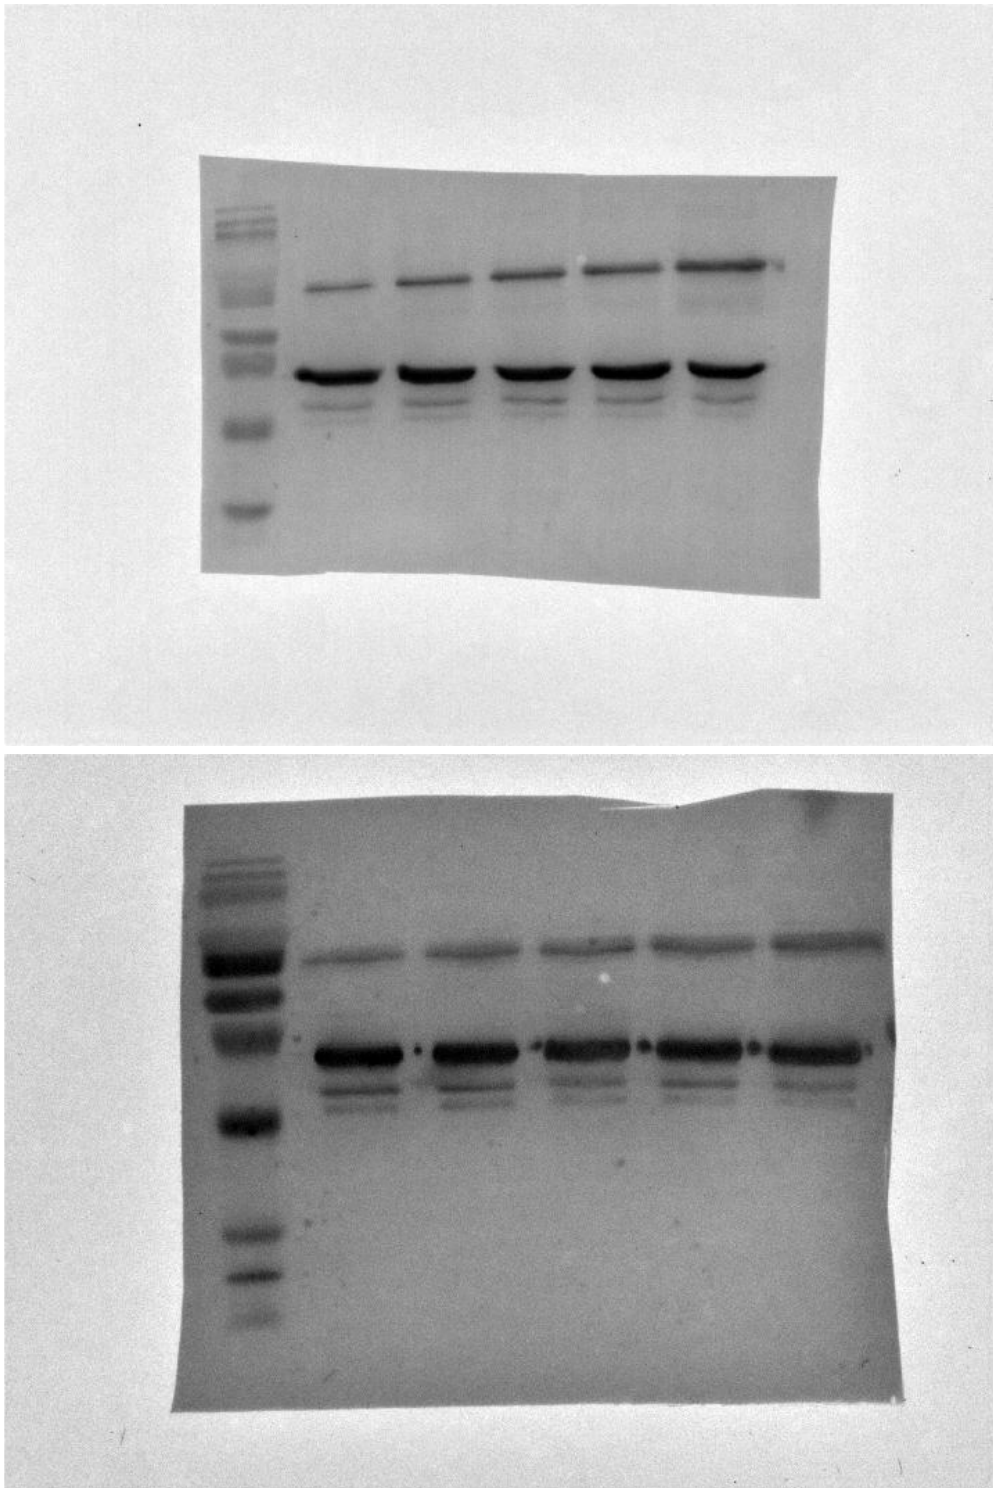

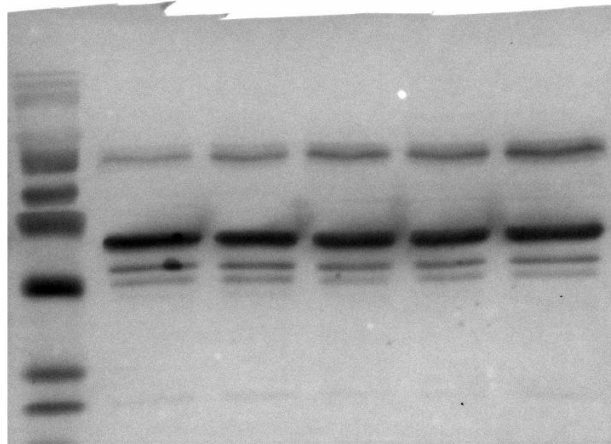

Atg5 (Corresponding to Figure 6)

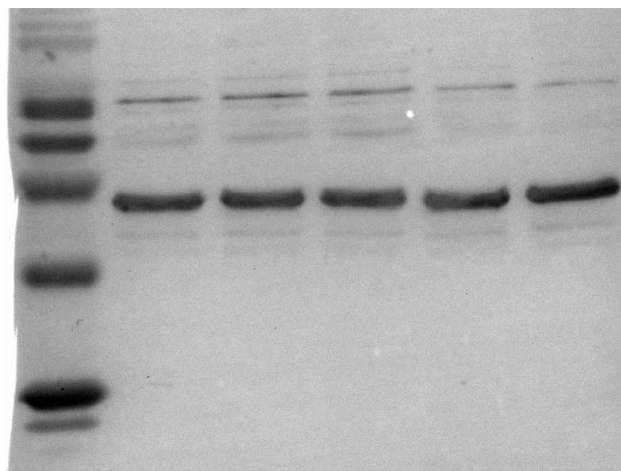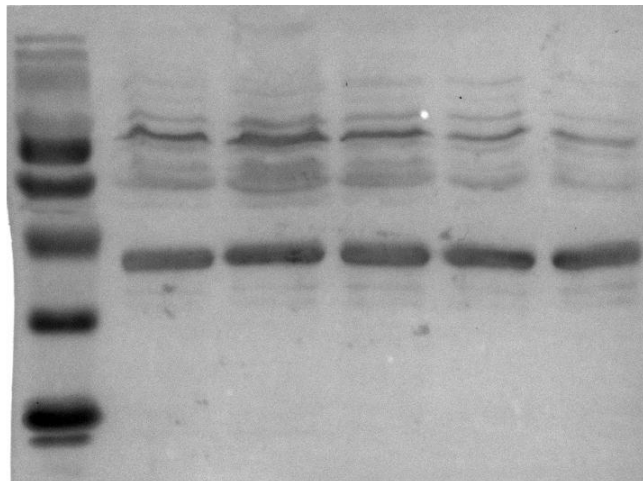

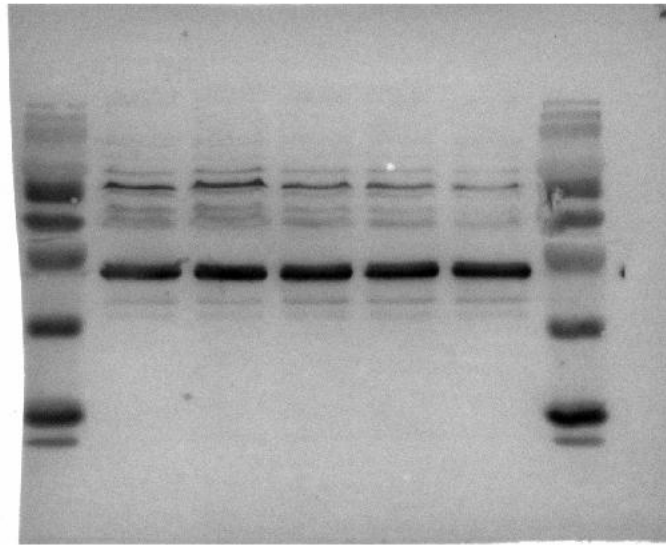

p62 (Corresponding to Figure 6)

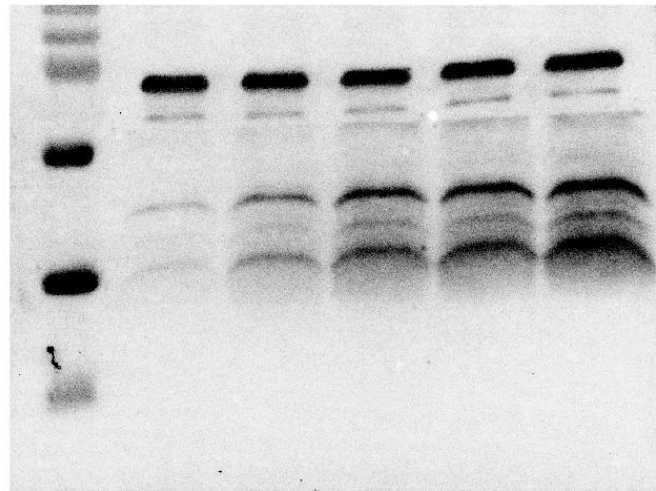

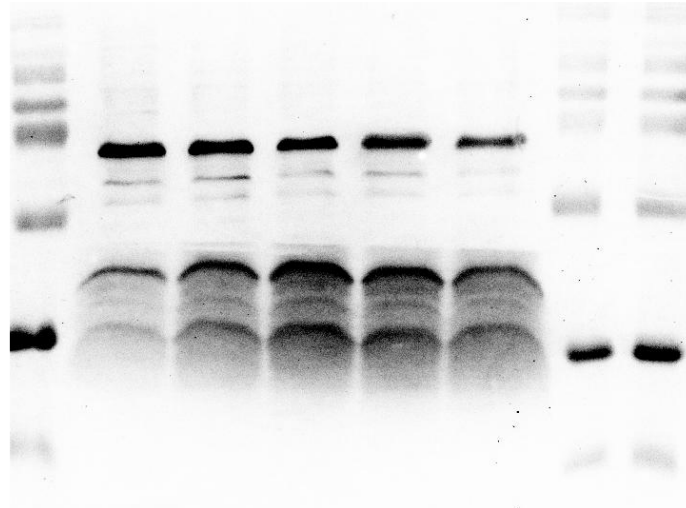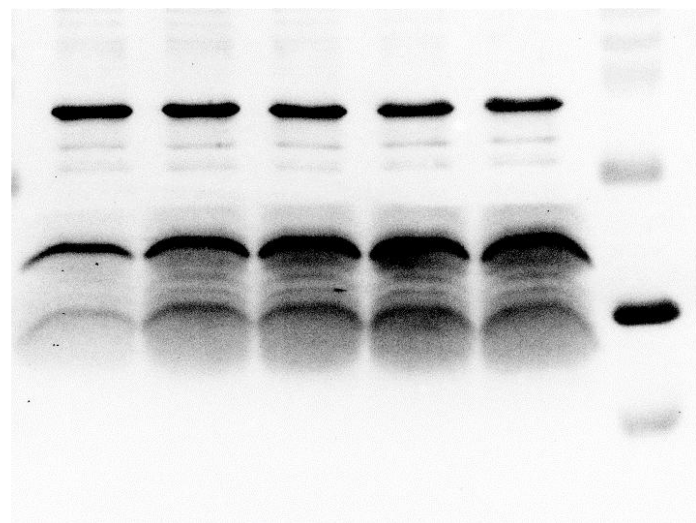

LC3B (Corresponding to Figure 6)

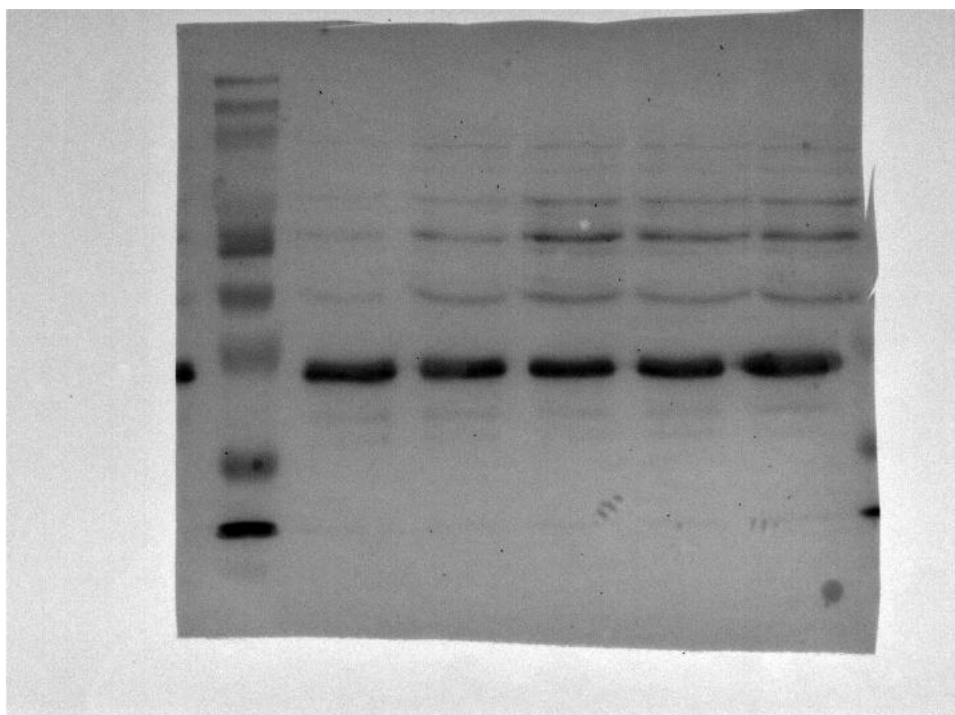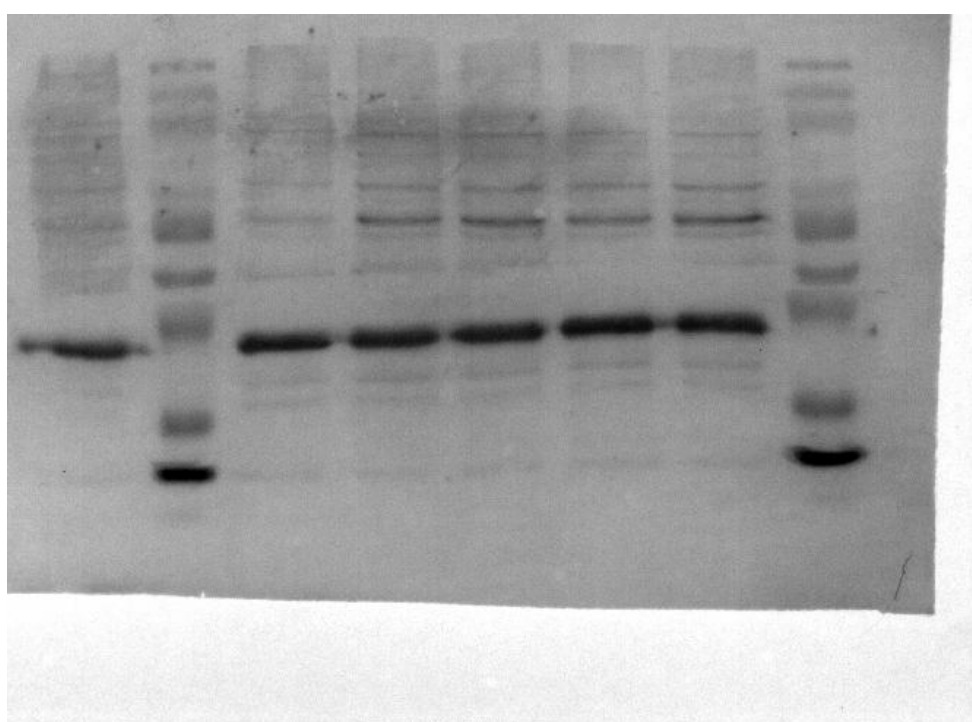

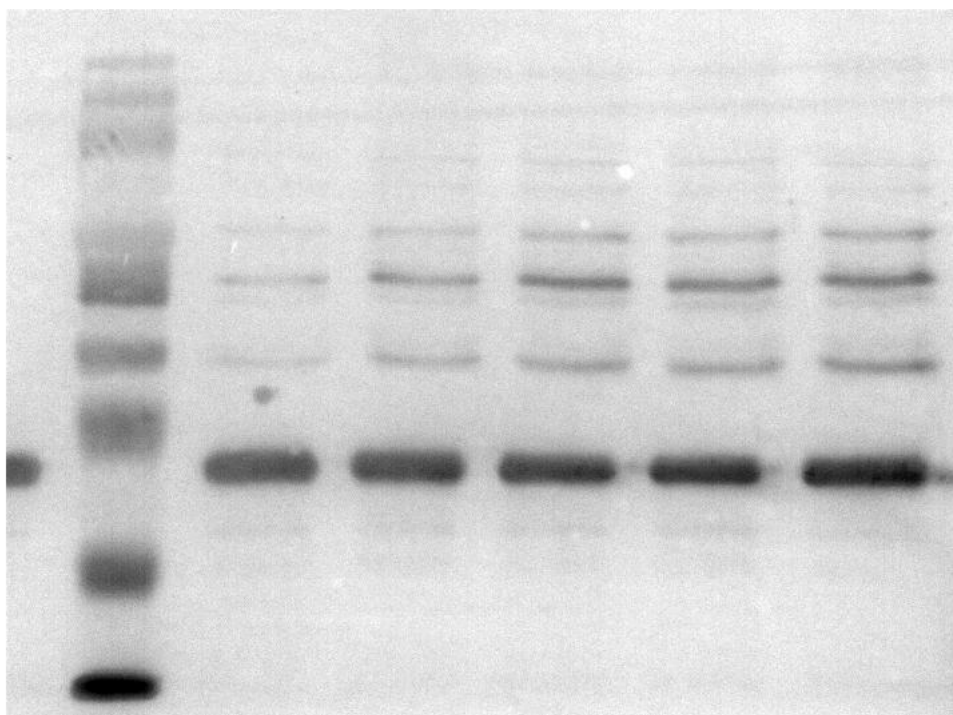

Pink1 (Corresponding to Figure 6)

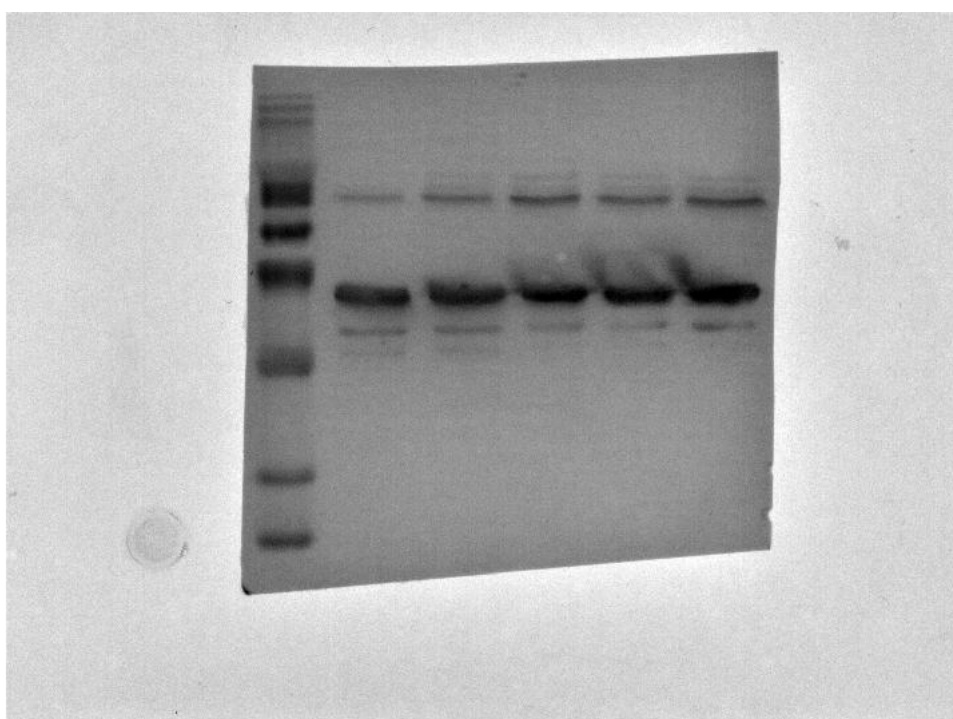



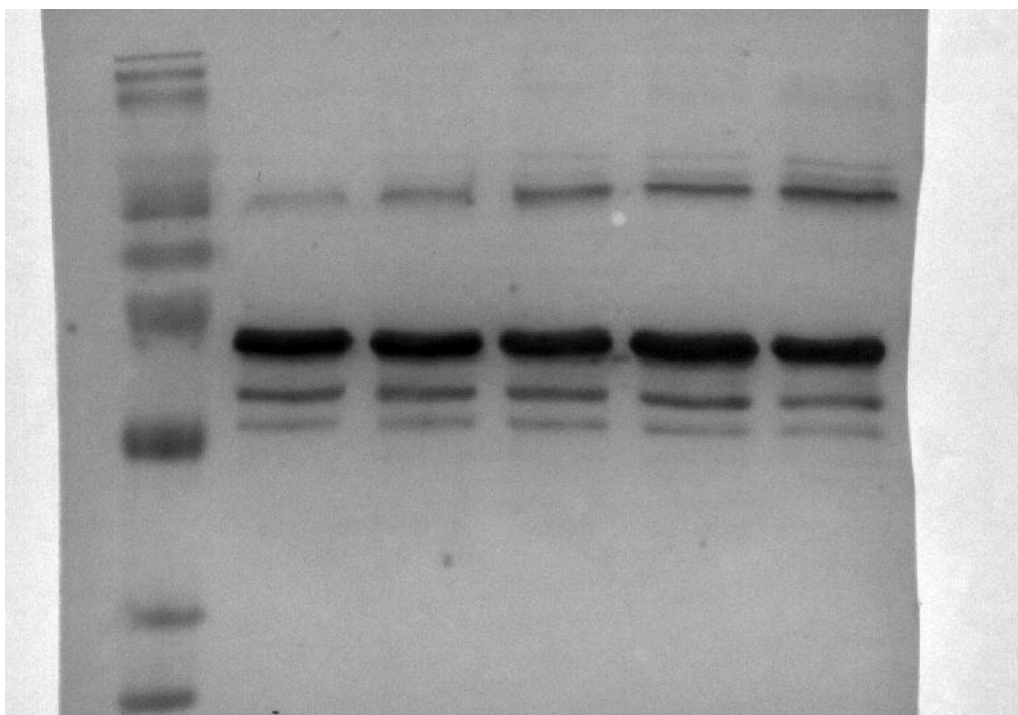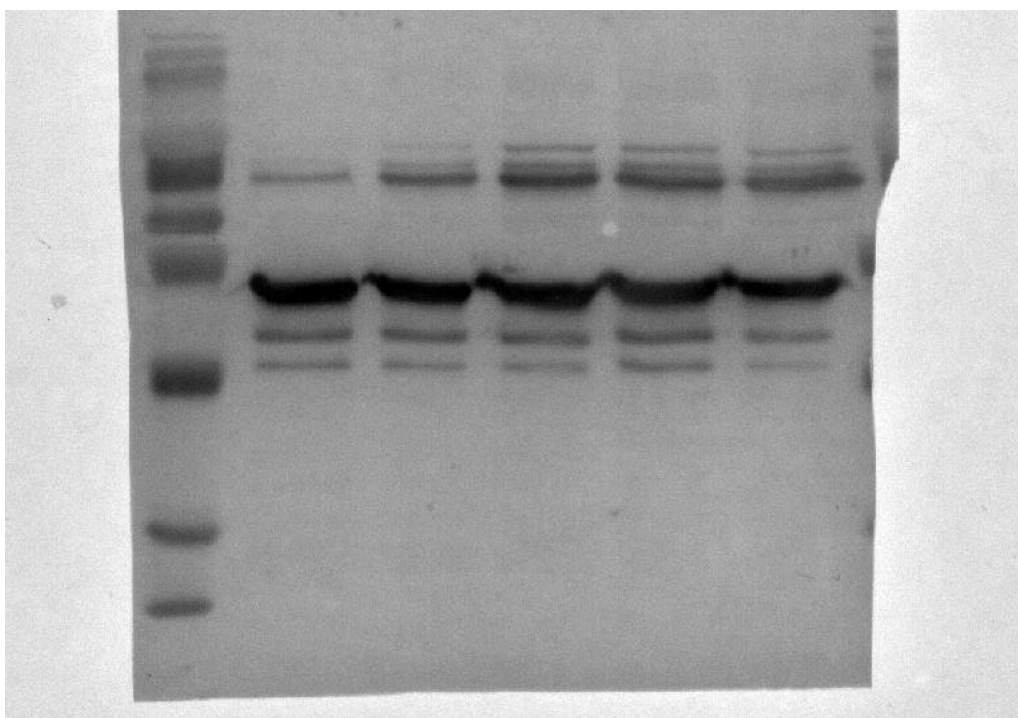

Parkin (Corresponding to Figure 6)
